# Supplementary material for: Serial crystallography captures enzyme catalysis in copper nitrite reductase at atomic resolution from one crystal
Source: PubMed Central journal article supplement (PMC4937782; doi:10.1107/s205225251600823x), 2016-06-15

# IUCrJ

**Volume 3 (2016)**

**Supporting information for article:**

**Serial crystallography captures enzyme catalysis in copper nitrite reductase at atomic resolution from one crystal**

**Sam Horrell, Svetlana V. Antonyuk, Robert R. Eady, S. Samar Hasnain, Michael A. Hough and Richard W. Strange**

**Table S1.** T1Cu bond distances and angles for selected serial datasets of nitrite soaked AcNiR

| Structure                 | ds1  | ds4  | ds11 | ds17 | ds30 | ds40 |
|---------------------------|------|------|------|------|------|------|
| <b>Bond length (Å)</b>    |      |      |      |      |      |      |
| His95 Nδ1                 | 2.05 | 2.04 | 2.04 | 2.04 | 2.05 | 2.05 |
| His145 Nδ1                | 2.04 | 2.03 | 2.02 | 2.03 | 2.05 | 2.04 |
| Cys136 Sγ                 | 2.21 | 2.21 | 2.22 | 2.22 | 2.24 | 2.25 |
| Met150 Sδ                 | 2.52 | 2.49 | 2.49 | 2.47 | 2.43 | 2.39 |
| <b>Bond angle (°)</b>     |      |      |      |      |      |      |
| His95 Nδ1-T1Cu-His145Nδ1  | 100  | 101  | 101  | 102  | 102  | 101  |
| His145 Nδ1-T1Cu-Cys136 Sγ | 106  | 108  | 107  | 108  | 108  | 109  |
| Cys136 Sγ-T1Cu-Met150 Sδ  | 107  | 107  | 107  | 108  | 108  | 109  |
| Met150 Sδ-T1Cu-His95 Nδ1  | 87   | 86   | 87   | 87   | 88   | 88   |
| Cys136 Sγ-T1Cu-His95 Nδ1  | 131  | 129  | 129  | 128  | 127  | 128  |
| Met150 Sδ-T1Cu-His145 Nδ1 | 129  | 127  | 127  | 125  | 124  | 122  |

**Figure S1** Ligand binding at the T2Cu site.  $4\sigma$ -weighted electron density  $F_o - F_c$  difference maps are shown for the datasets reported in Table 1 of the manuscript.

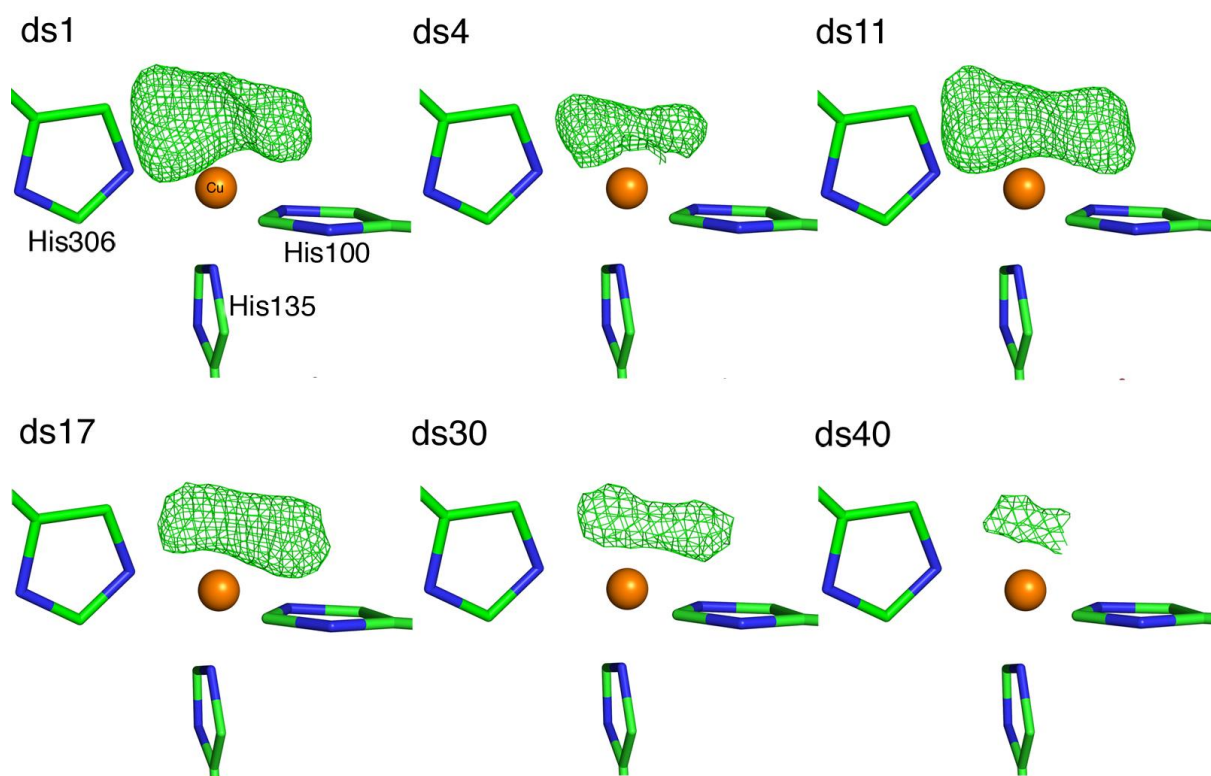

**Figure S2** Ligand modelling for ds10 of the serial data collection with 2Fo-Fc density contoured to  $1\sigma$ . All Asp98 residues are modelled at 40% and 60% for the gatekeeper and proximal conformations, respectively. a) A single side-on nitrite molecule at 70% occupancy. b) A single side-on nitrite molecule at 70% occupancy with waters W1 and W2 modelled at 20% and 80% occupancy, respectively. c) Dual occupancy nitrite and nitric oxide molecules at 33% each with waters W1 and W2 at 33% and 80% occupancy, respectively. d) Dual occupancy nitrite and nitric oxide at 33% occupancy each with nitric oxide in an end on orientation and a water molecule at 80% occupancy. e) Dual occupancy nitrite and nitric oxide molecules at 33% occupancy with a second nitric oxide molecule in the end on conformation at 33% occupancy. f) Dual occupancy nitric oxide molecules at 35% occupancy with one in an end on conformation. d) Dual occupancy nitric oxide molecules at 35% occupancy with one in an end on conformation with a water molecule at 80% occupancy. Asp98, nitrite and nitric oxide are represented as sticks and water molecules and copper atoms as spheres. All atoms are coloured by element.

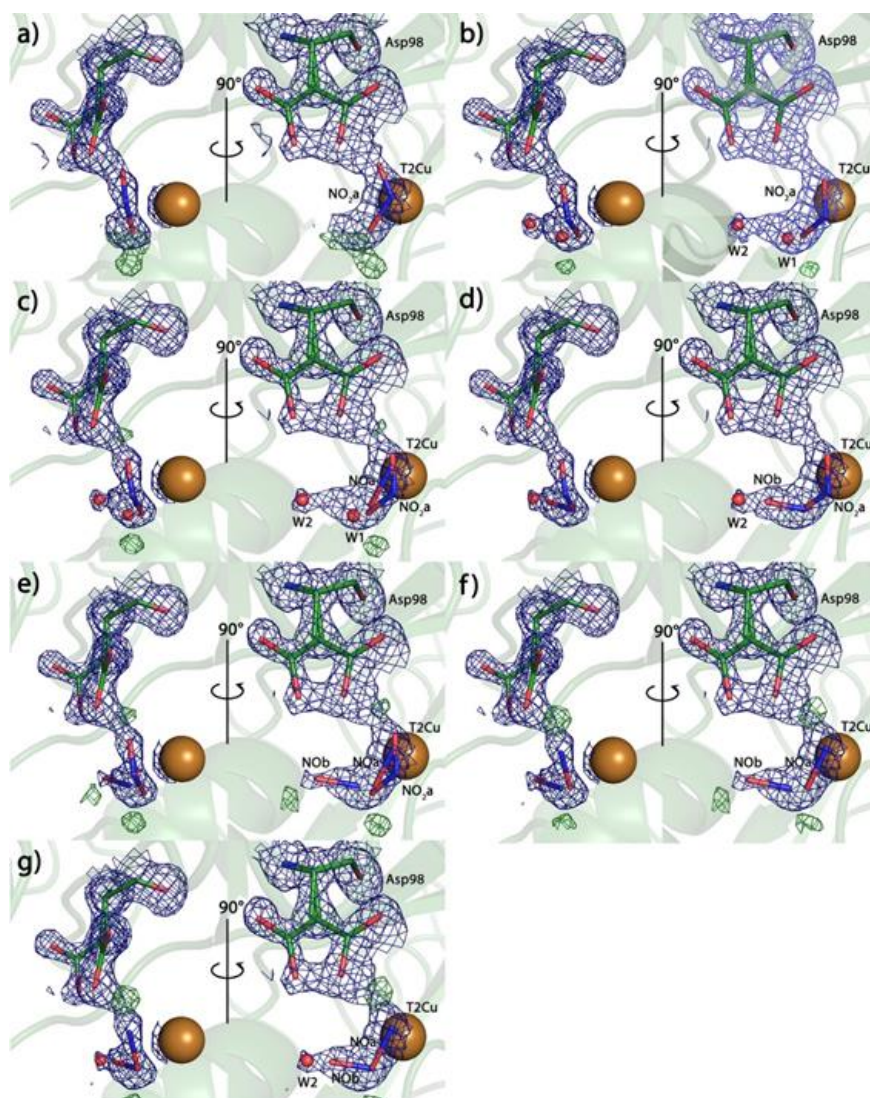

**Figure S3.** Ligand and Asp98 conformation occupancy plotted against dataset number. a) T2Cu ligand occupancy with total nitrite occupancy (the sum of multiple conformations when present) as green triangles, nitric oxide occupancy as orange circles and water occupancy as purple diamonds. b) Asp98 alternate conformation occupancies with the proximal conformation as red squares and the gatekeeper conformation as blue diamonds.

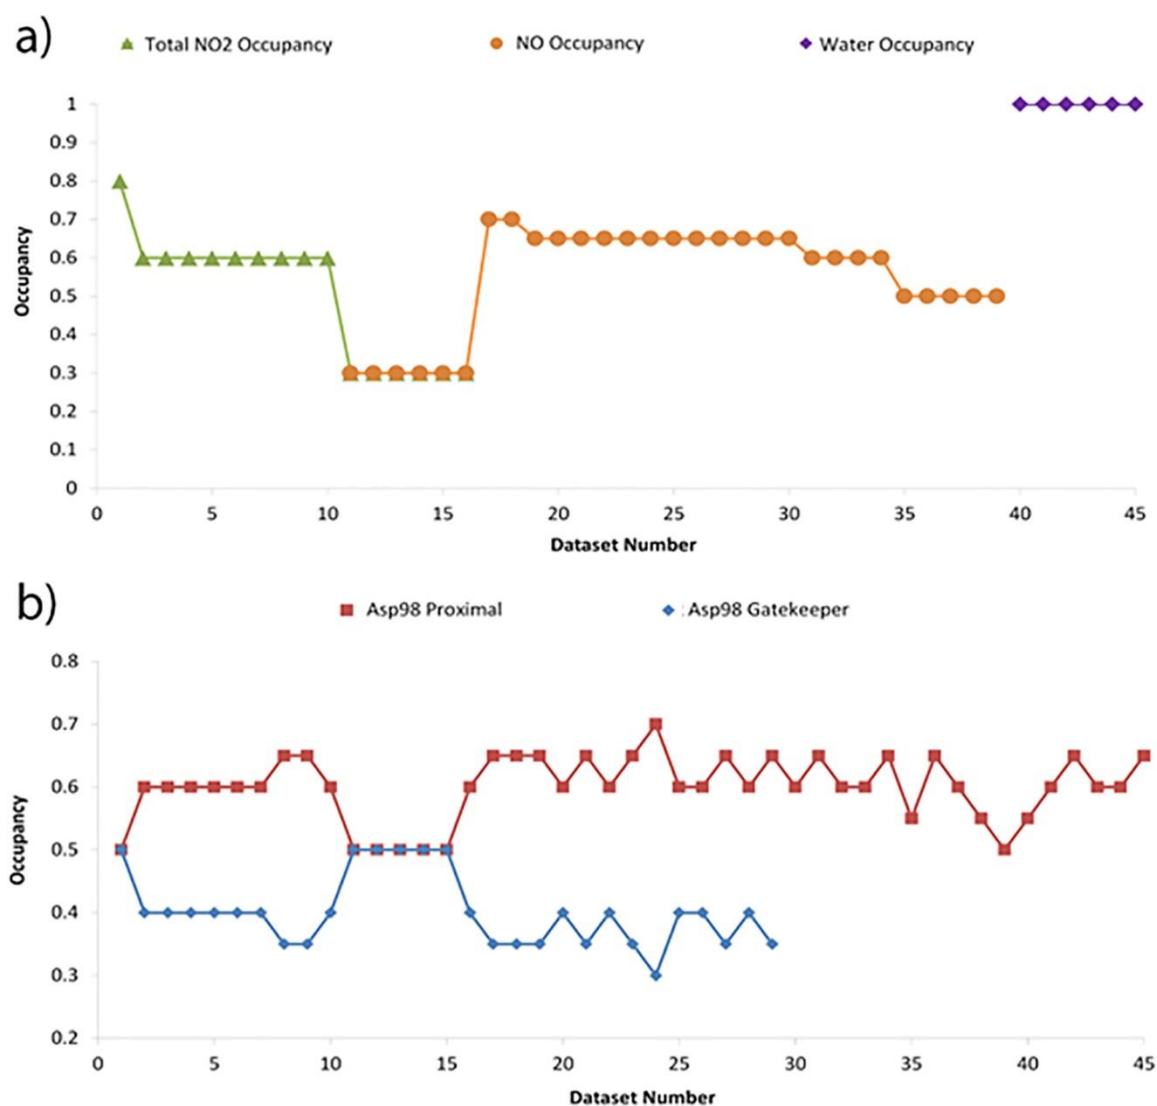

**Figure S4.** Superposition of the T2Cu copper site of datasets from serial data collection with nitrite bound ds1 (green), side on nitrite bound ds4 (wheat), nitrite and nitric oxide bound ds11 (orange), nitric oxide bound ds17 (purple) and nitric oxide bound ds30 (cyan). Residues and ligands are represented as sticks and copper atoms as spheres.

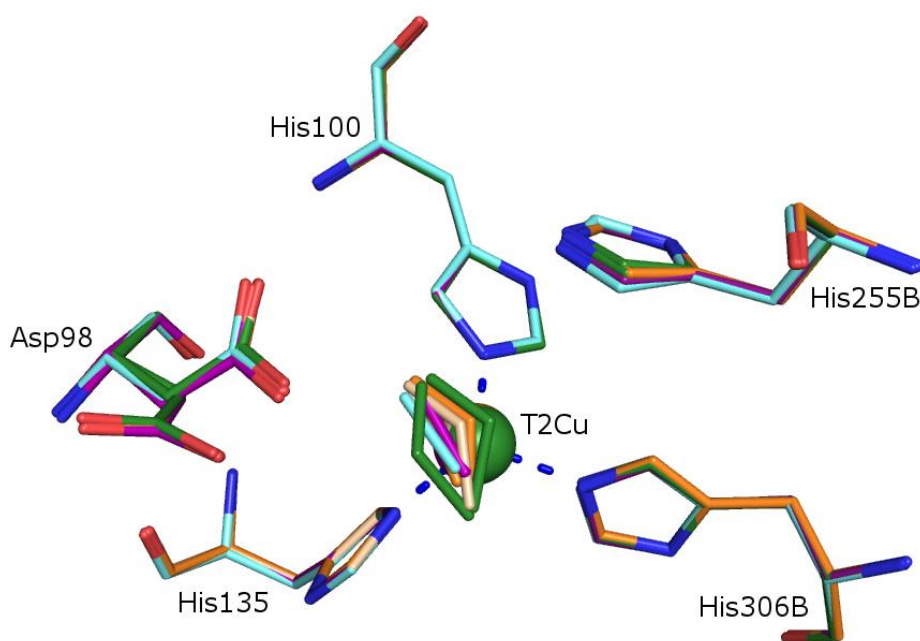

Supplement: m-03-00271-sup1.pdf [file m-03-00271-sup1.pdf]
